# Supplementary material
Source: publisher figshare collection journal article supplement (https://acs.figshare.com/ndownloader/files/3951061)
Supplement: Supplementary file 1 [file 3951061]

# Spontaneous Formation of Nano Cubic Particles and Spherical Vesicles in Catanionic Mixtures of Ester-containing Gemini Surfactants and Sodium Dodecyl Sulfate in Presence of Electrolyte

Hasti Aghdastinat<sup>a</sup>, Soheila Javadian<sup>\*,a</sup>, Alireza Tehrani-Bagha<sup>b,c</sup>, Hussein Gharibi<sup>a</sup>

<sup>a</sup> Department of Physical Chemistry, Tarbiat Modares University, P.O. Box 14115-117, Tehran, Iran.

<sup>b</sup> Department of Chemical and Biological Engineering, Chalmers University of Technology, SE-412 96 Göteborg, Sweden.

<sup>c</sup> Institute for Color Science and Technology, Tehran, Iran.

<sup>\*</sup> **Corresponding author:** Soheila Javadian, Department of Physical Chemistry, Tarbiat Modares University, P.O. Box 14115-117, Tehran, Iran. Tel: 98 21 82883477, Fax: 98 21 82883455, email: javadian\_s@modares.ac.ir.

## S1. Theory

The surface excess concentration ( $\Gamma_{\max}$ , mol.m<sup>-2</sup>) of a surfactant is a measure of adsorption at the air/water interface. The surface excess ( $\Gamma_{\max}$ ) and the minimum area per molecule ( $A_{\min}$ ) were calculated using the Gibbs adsorption equation:

$$\Gamma_{\max} / \text{mol.m}^{-2} = \frac{-1}{2.303 n R T} \left( \frac{d\gamma}{d \log c} \right)_{T,P} \quad (1)$$

and

$$A_{\min} / \text{nm}^2 \cdot \text{molecule}^{-1} = \frac{10^{18}}{N_A \Gamma_{\max}} \quad (2)$$

Where  $R$ ,  $T$ ,  $C$ , and  $N_A$  are the gas constant, absolute temperature, surfactant concentration and Avogadro's constant, respectively.  $n$  is the number of species formed in the solution by the dissociation of the surfactant molecules. For mixture of two different surfactants, the value of  $n$  for the mixture,  $n_{\text{mix}} = n_1 Z_1 + n_2 Z_2$ , where  $n_1$  and  $n_2$  are the values for individual surfactants 1 and 2 and  $Z_1$  and  $Z_2$  are their respective mole fractions at the interface.<sup>1</sup>

The surface activity,  $pC_{20}$ , is an index of surface tension reduction efficiency:

$$pC_{20} = -\log C_{20} \quad (3)$$

$C_{20}$  is the molar concentration of surfactant required to reduce the surface tension of the solvent by 20 mN.m<sup>-1</sup>.

The surface pressures  $\pi_{CMC}$  were calculated from

$$\pi_{CMC} = \gamma_{\circ} - \gamma_{CMC} \quad (4)$$

Where  $\gamma_{\circ}$  is the surface tension of the solvent (i.e. here water) and  $\gamma_{CMC}$  is the surface tension of the solution at CMC.

Applying the mass action law, the Gibbs free energy of micellization has been derived for the gemini surfactants as follows:

$$\Delta G^{\circ}_{mic} / (\text{kJ.mol}^{-1}) = RT (1.5 - \alpha_{\text{diss}}) \ln X_{CMC} \quad (5)$$

Where  $X_{CMC}$  is the CMC value on the mole fraction scale and  $\alpha_{\text{diss}}$  is the degree of counterion dissociation.

The standard free energy of adsorption ( $\Delta G^{\circ}_{\text{ads}}$ ) for surfactants at the air/solution interface was also calculated by the equation (6):

$$\Delta G^{\circ}_{ads}/(kJ.mol^{-1}) = \Delta G^{\circ}_{mic} - \left(\frac{\pi_{CMC}}{\Gamma_{max}}\right) \quad (6)$$

The nature and the strength of the interactions between two surfactants in binary systems can be determined by calculating interaction parameter,  $\beta$ , which can be obtained using the regular solution model developed by Rubingh et al.<sup>2-3</sup>

The interaction parameter for mixed micelle in an aqueous medium,  $\beta^M$ , is calculated using the following equations:

$$\frac{(X_1)^2 \ln(\alpha_1 C_{12}^M / X_1 C_1^M)}{(1-X_1)^2 \ln[(1-\alpha_1)] C_{12}^M / (1-X_1) C_2^M} = 1 \quad (7)$$

$$\beta^M = \frac{\ln[\alpha_1 C_{12}^M / X_1 C_1^M]}{(1-X_1)^2} \quad (8)$$

Where  $X_1$  is the mole fraction of SDS in the mixed micelle and  $C_1^M$ ,  $C_2^M$  and  $C_{12}^M$  are the CMCs for surfactant 1, surfactant 2 and their mixture, respectively, at the mole fraction  $\alpha_1$ .

The activity coefficients of SDS ( $f_1$ ) and gemini surfactant ( $f_2$ ) within micelles were calculated by following equations using the micelle mole fraction,  $X_1$ , obtained by the Rubingh method:

$$f_1 = \exp[\beta(1-X_1)^2] \quad (9)$$

$$f_2 = \exp[\beta(X_1)^2] \quad (10)$$

The interaction parameter for mixed monolayer at the aqueous solution/air interface,  $\beta^{\sigma}$ , is calculated using the following equations:

$$\frac{Z_1^2 \ln(\alpha_1 C_{12} Z_1 C_1^0)}{(1-Z_1)^2 \ln[(1-\alpha_1)] C_{12} / (1-Z_1) C_2^0} = 1 \quad (11)$$

$$\beta^{\sigma} = \frac{\ln(\alpha_1 C_{12} / Z_1 C_1^0)}{(1-Z_1)^2} \quad (12)$$

Where  $Z_1$  is the mole fraction of surfactant 1 in the total mixed monolayer (on a surfactant-only basis); and  $C_1^0$ ,  $C_2^0$  and  $C_{12}$  are the molar concentrations of surfactant 1, surfactant 2, and their mixture, respectively, in the solution phases required to produce a given surface tension value at the mole fraction  $\alpha_1$  of surfactant 1. Equation (11) is solved numerically for  $Z_1$ , which is then substituted into equation (12) to calculate  $\beta^{\sigma}$ .

The ideal mixing minimum area per molecule,  $A_{ideal}$ , calculated from the equation:

$$A_{ideal} = Z_1 A_1 + (1-Z_1) A_2 \quad (13)$$

Where  $Z_1$  is the mole fraction of SDS in the mixed monolayer, and  $A_1$  and  $A_2$  are the minimum area per molecule of SDS and geminis, respectively.

The  $G_{mic}^{ex}$  values have been estimated using equation (14) and the values of activity coefficients,  $f_1$  and  $f_2$  calculated using equations (9) and (10), respectively.

$$G_{mic}^{ex} = RT[X_1 \ln f_1 + (1 - X_1) \ln f_2] \quad (14)$$

The experimental  $G_{mic}^{ex}$  values have also been calculated from:

$$G_{mic}^{ex} = \Delta G_{mic,mix}^0 - [X_1 \Delta G_{mic,1}^0 + (1 - X_1) \Delta G_{mic,2}^0] \quad (15)$$

Where  $\Delta G_{mic,1}^0$  and  $\Delta G_{mic,2}^0$  are the micellization Gibbs free energy of surfactant 1 and 2, respectively.

In CV, the peak current  $i_{pa}$  for a redox-active reversible system is given by the Randles–Sevcik equation:

$$i_{pa} = 0.4463 F A C n \left( \frac{n F \nu D_{agg}}{RT} \right)^{\frac{1}{2}} \quad (16)$$

Where  $n$  is the number of electrons involved in oxidation or reduction,  $F$  is Faraday's constant,  $A$  is the area of the electrode,  $D_{agg}$  is the diffusion coefficient of the ferrocene probe,  $C$  is the concentration of the ferrocene in the solution,  $R$  is the gas constant,  $T$  is the absolute temperature, and  $\nu$  is the scan rate.

At concentrations above but not far from the CMC, aggregates mutually interact; consequently, the calculated values for diffusion coefficients are lower than those at the CMC. The linear interaction theory was used to calculate the interparticle interaction parameter,  $k_d$ :

$$D_{agg} = D_{agg}^0 [1 - k_d (C_s - CMC)] \quad (17)$$

Where  $D_{agg}^0$  is the self-diffusion coefficient in the absence of particle interaction (infinite dilution), and  $C_s$  is the surfactant concentration.

In CV measurements, the mean hydrodynamic radius ( $R_h$ ), was determined by the Stokes–Einstein equation:

$$R_h = \frac{kT}{6\pi\eta D_{agg}} \quad (18)$$

Where  $k$ ,  $T$  and  $\eta$  are the Boltzmann constant, absolute temperature and viscosity of medium, respectively.

The packing parameter,  $p$ , is:<sup>1</sup>

$$p = V_H / l_c a_0 \quad (19)$$

Where  $V_H$  is the volume occupied by the hydrophobic portion of the surfactant in the micellar core,  $l_c$  is the length of its hydrophobic portion in the core, and  $a_0$  is the cross-sectional area occupied by its hydrophilic portion at the micelle-solution interface.

1. Rosen, M. J., *Surfactants and Interfacial Phenomena*. third ed.; John Wiley and Sons: New Jersey, 2004.
2. Holland, P. M.; Rubingh, D. N., Nonideal Multicomponent Mixed Micelle Model. *J. Phys. Chem* **1983**, *87*, 1984-1990.
3. Schulz, P. C.; Rodríguez, J. L.; Minardi, R. M.; Sierra, M. B.; Morini, M. A., Are the mixtures of homologous surfactants ideal? *J. Colloid Interface Sci.* **2006**, *303*, 264-271.

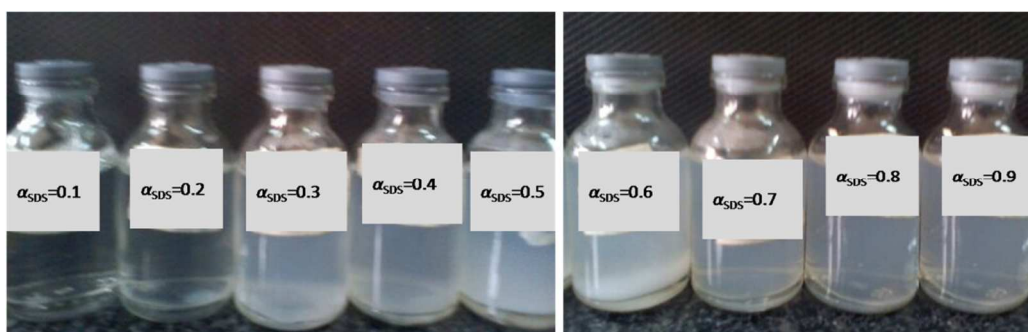

(a)

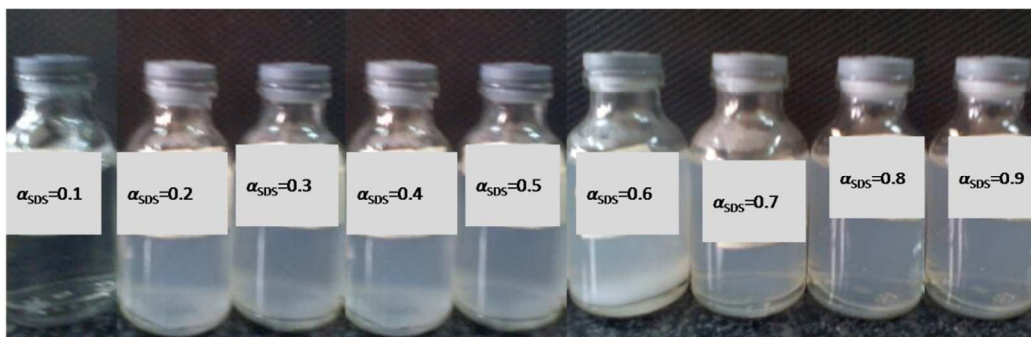

(b)

**Figure S1:** Phase behavior of (a) esterquat gemini and (b) betainate gemini at various mole fractions of SDS.

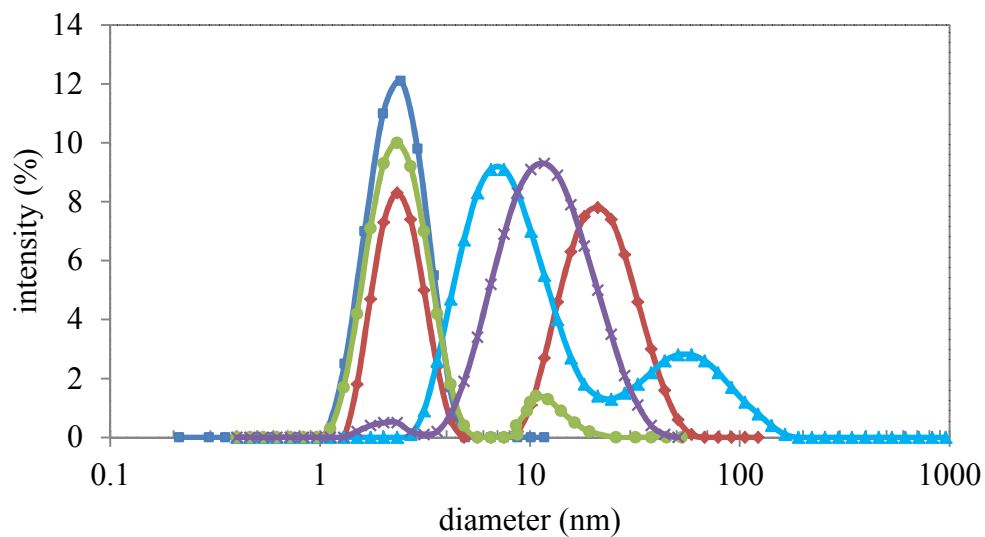

(a)

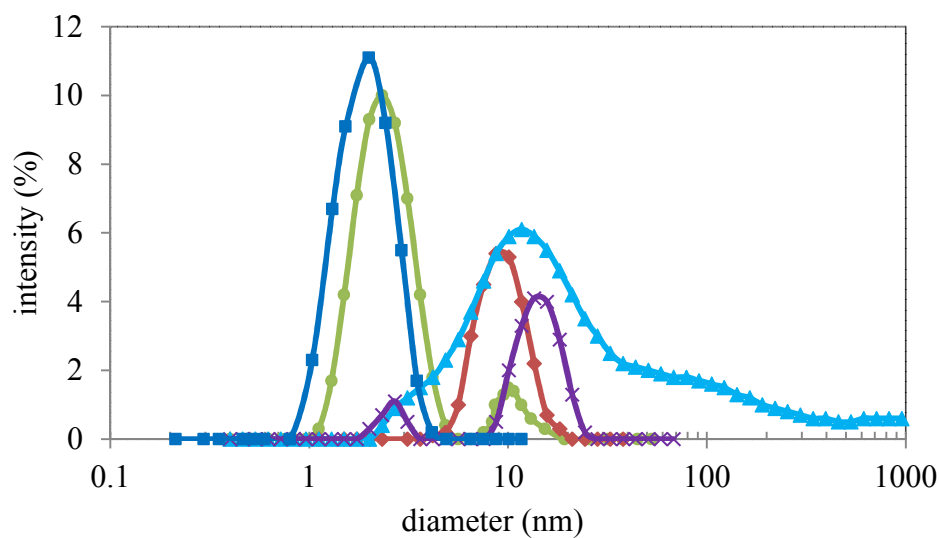

(b)

**Figure S2:** Size distribution of gemini surfactants and mixed systems in the absence of KCl at: (a)  $[C_{\text{tot}}]=15\text{ mM}$ , (b)  $[C_{\text{tot}}]=5\text{ mM}$  (  $\blacksquare$  ) pure esterquat gemini, (  $\blacklozenge$  ) esterquat gemini/SDS ( $\alpha_{\text{SDS}}=0.1$ ), (  $\blacktriangle$  ) esterquat gemini/SDS ( $\alpha_{\text{SDS}}=0.2$ ), (  $\bullet$  ) pure betainate gemini, (  $\times$  ) betainate gemini/SDS ( $\alpha_{\text{SDS}}=0.1$ ).

**Table S1.** The Viscosity of solutions in the presence of 0.05 M KCl and at 298K.

| [C <sub>tot</sub> ] (mM) | System                                            | Viscosity (cP) |
|--------------------------|---------------------------------------------------|----------------|
| 5                        | esterquat gemini                                  | 1.27           |
| 15                       | esterquat gemini                                  | 1.31           |
| 5                        | betainate gemini                                  | 1.11           |
| 20                       | betainate gemini                                  | 2.82           |
| 5                        | esterquat gemini/SDS<br>$\alpha_{\text{SDS}}=0.1$ | 1.31           |
| 15                       | esterquat gemini/SDS<br>$\alpha_{\text{SDS}}=0.1$ | 1.93           |
| 5                        | betainate gemini/SDS<br>$\alpha_{\text{SDS}}=0.1$ | 1.22           |
| 15                       | betainate gemini/SDS<br>$\alpha_{\text{SDS}}=0.1$ | 2.11           |
